# Supplementary figures and images for: Intercommunity and temporal variation of eleven essential and five toxic elements in human placentas from deliveries in thirteen arctic and sub-arctic areas of Russia and Norway
Source: Royal Society of Chemistry journal article supplement (doi:10.1039/b206776p), 2002-12-17

# Ba

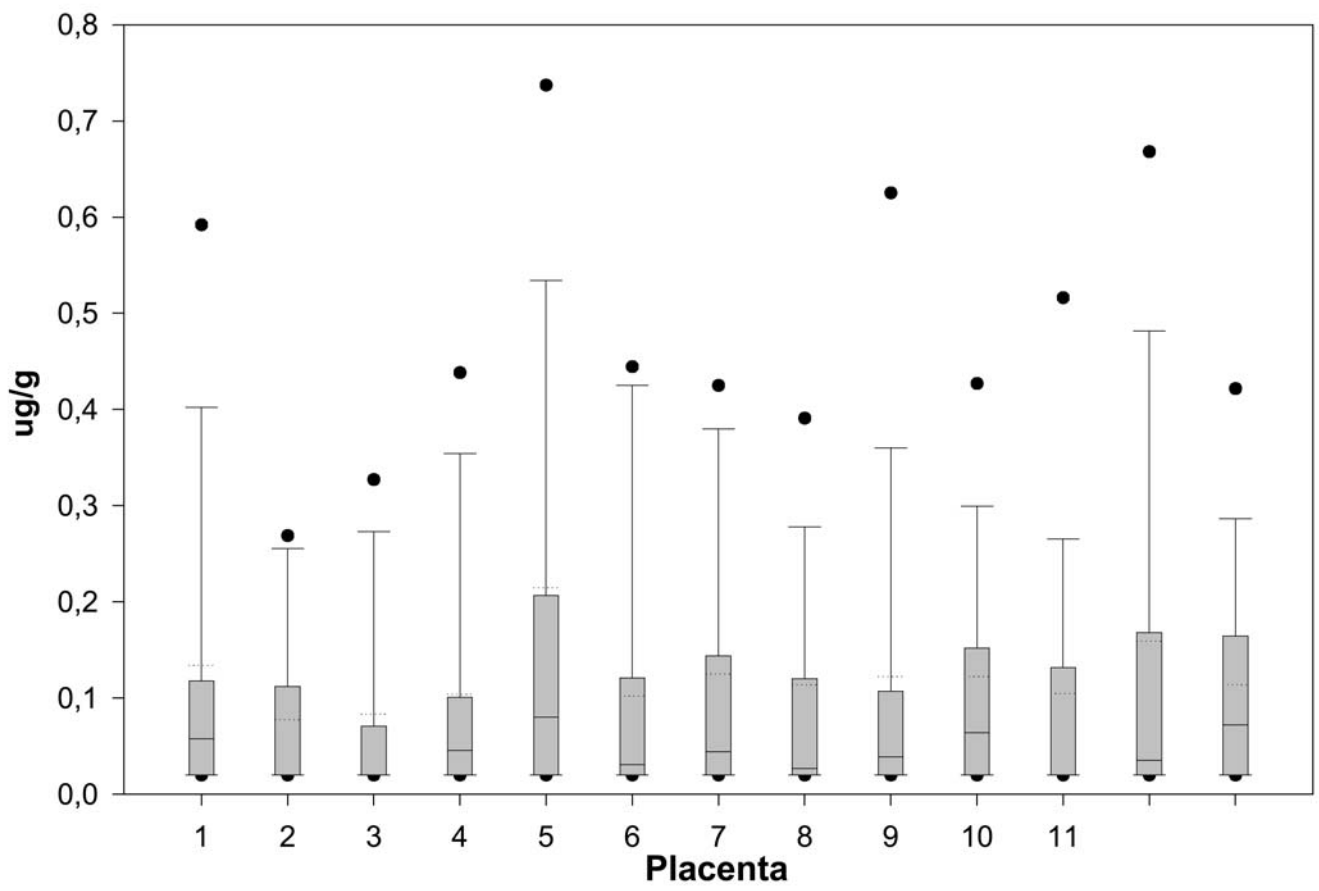

# Ca

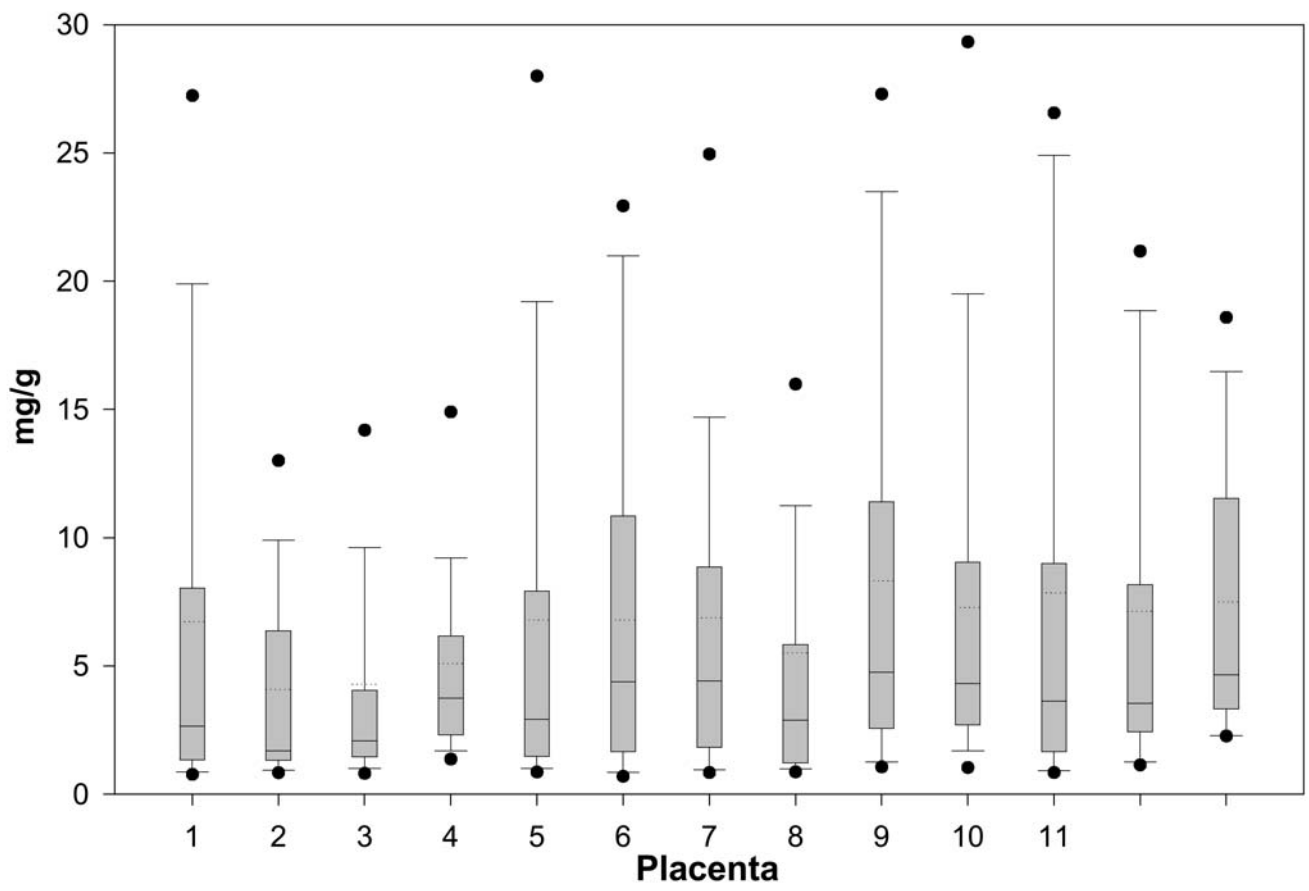

# Cu

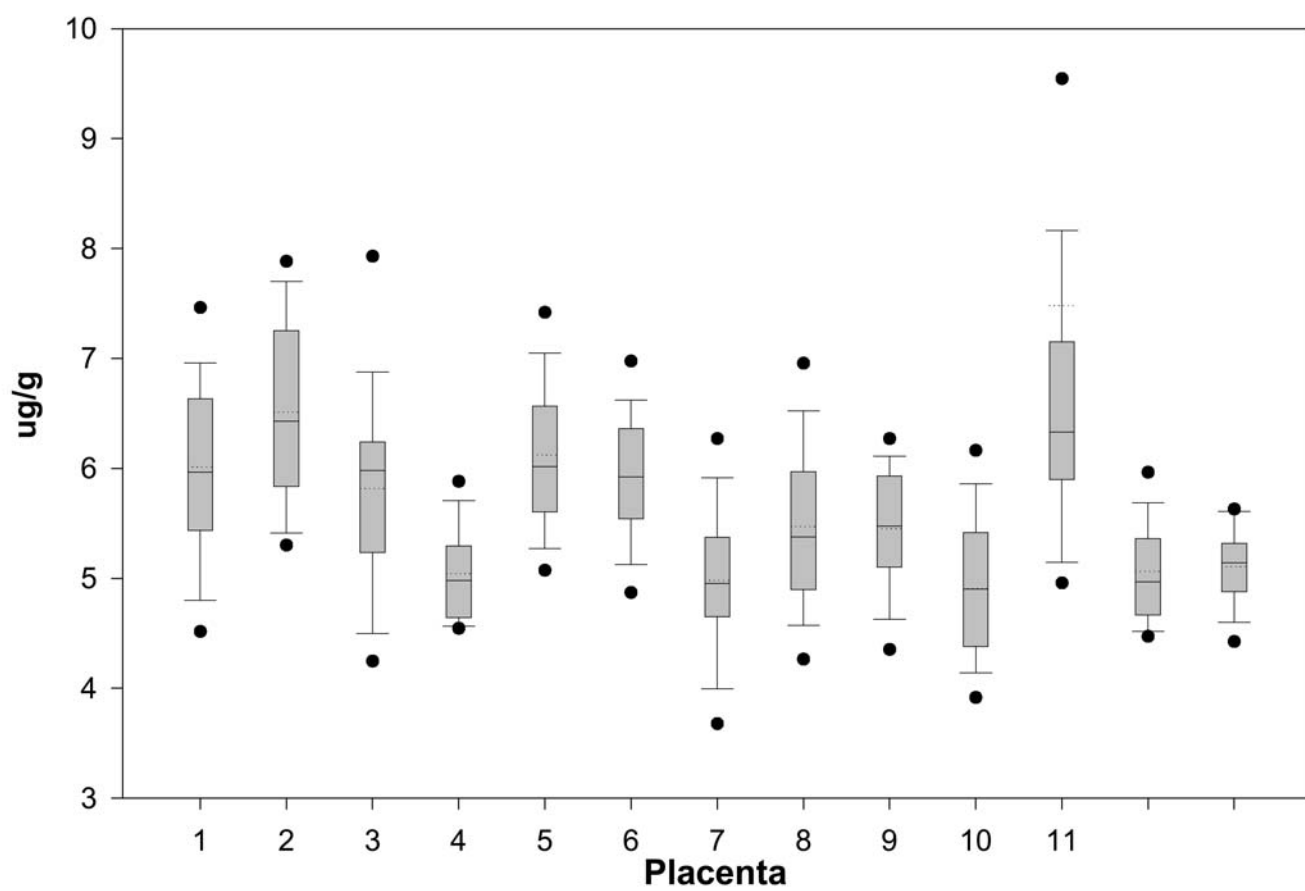

# K

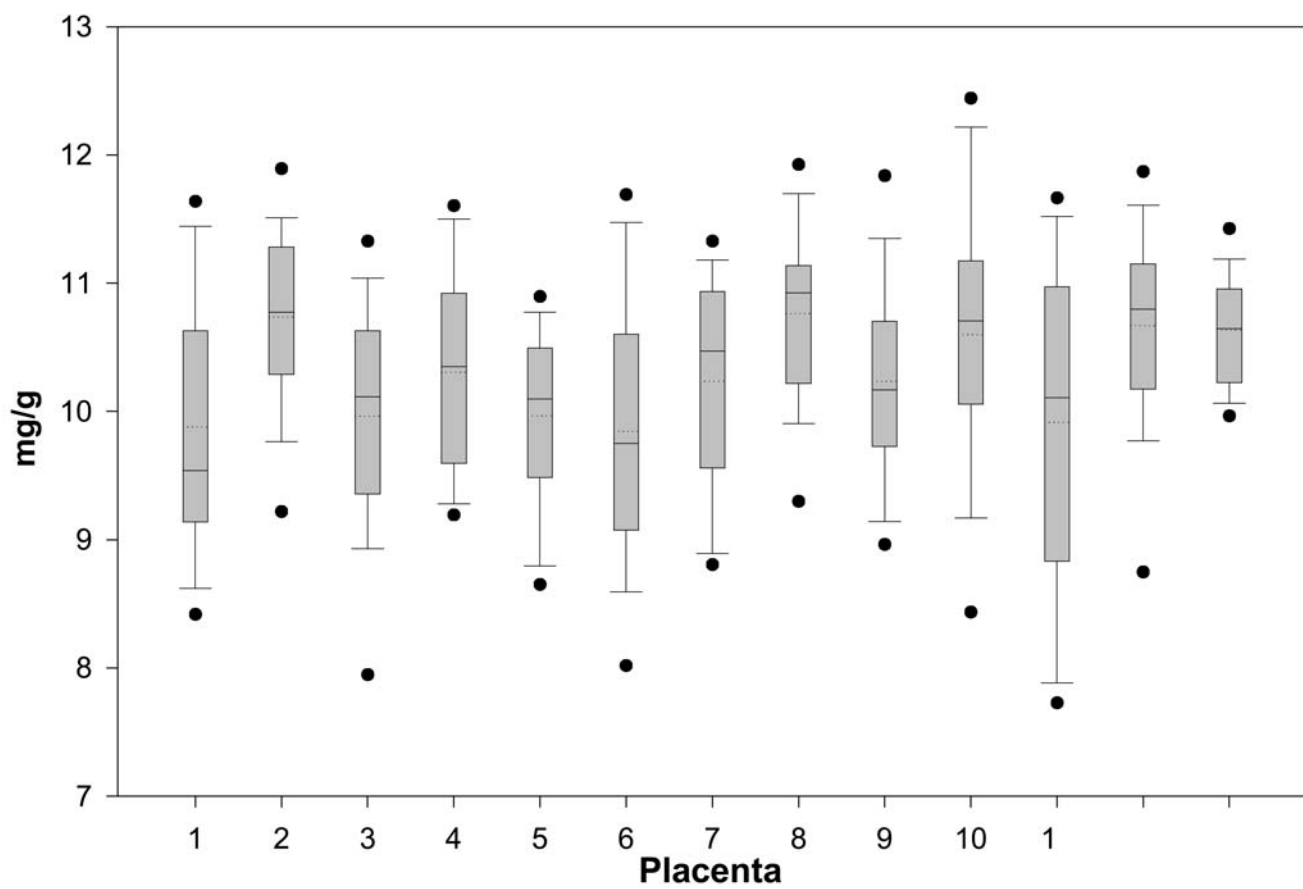

# Mg

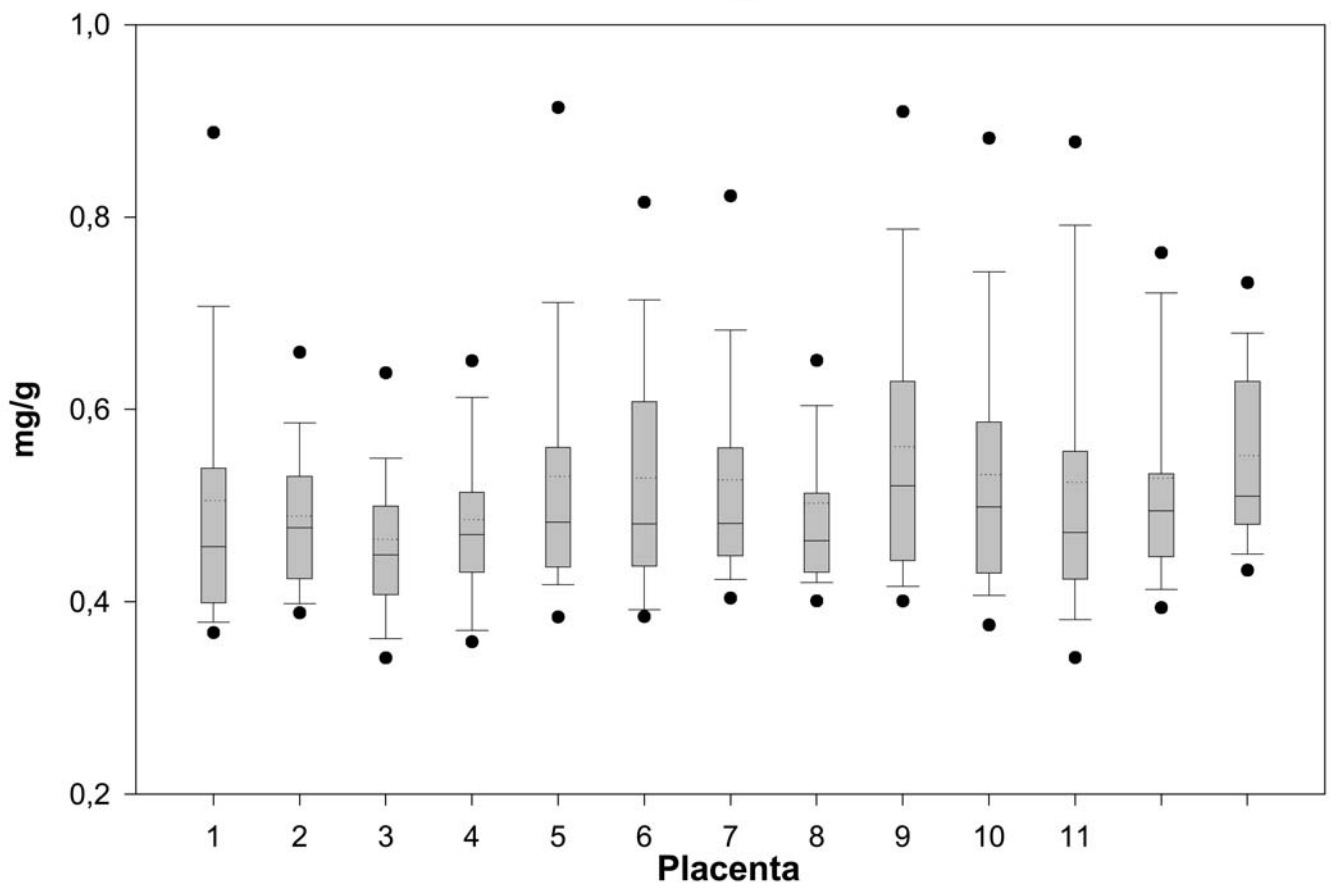

# Mn

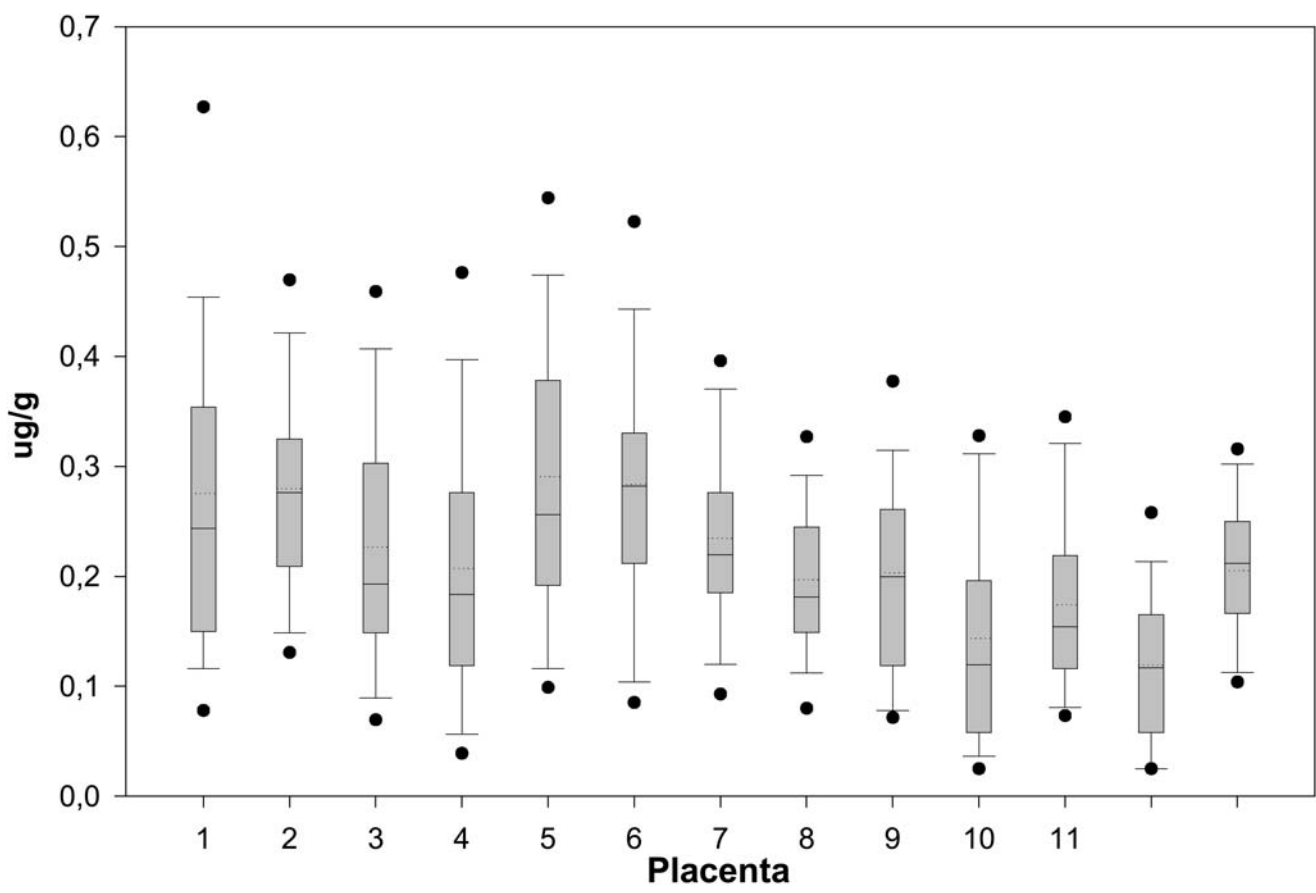

# Na

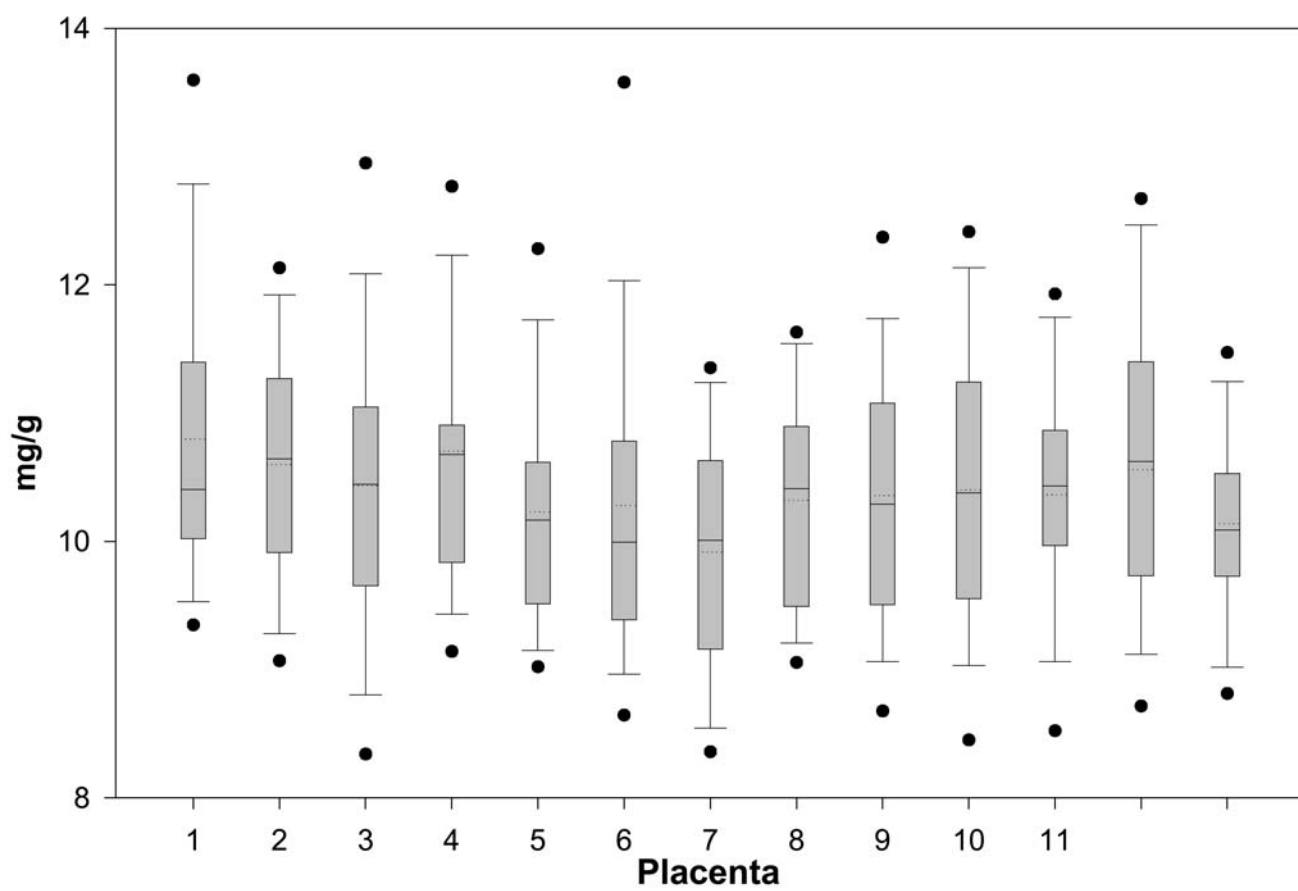

# Ni

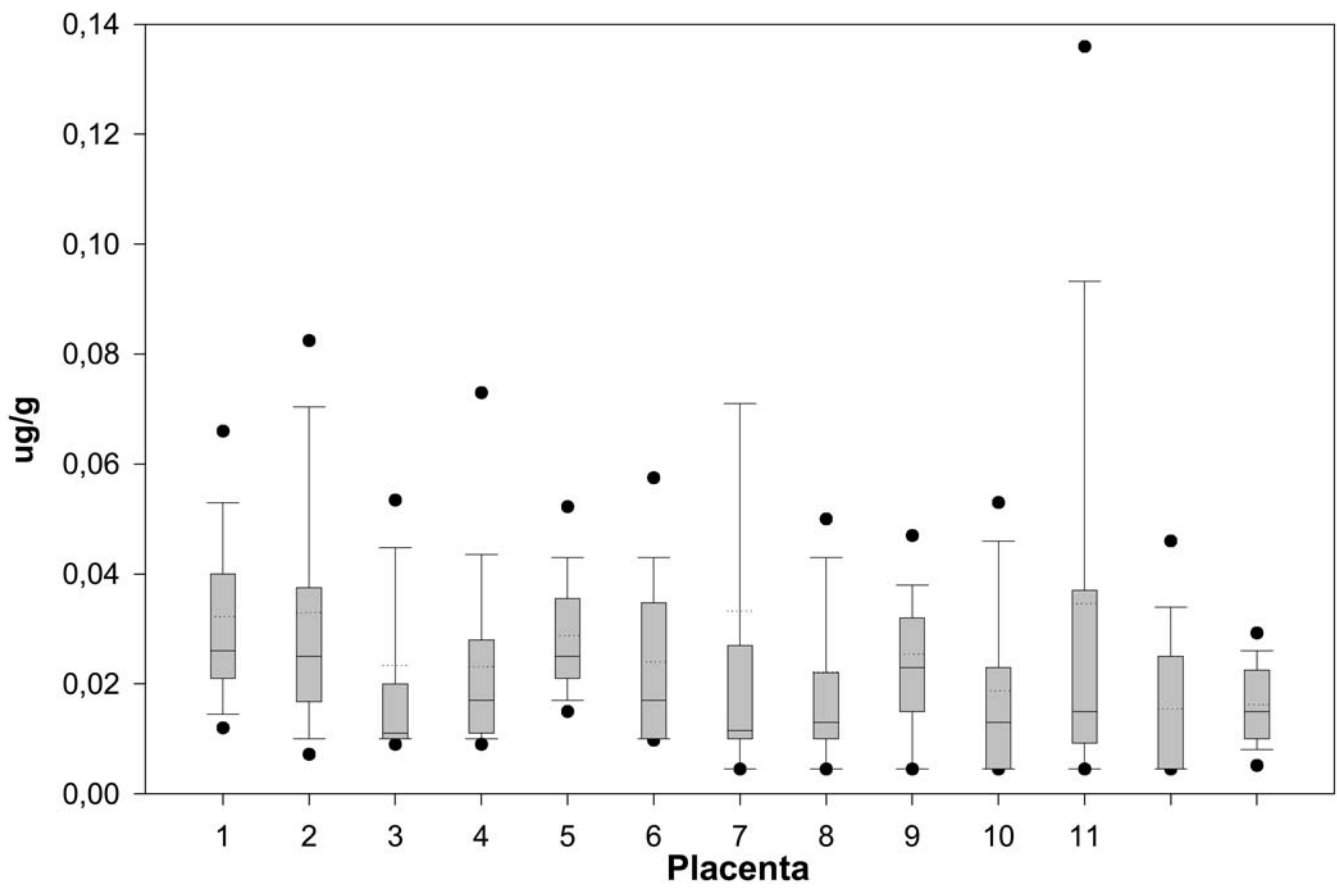



P

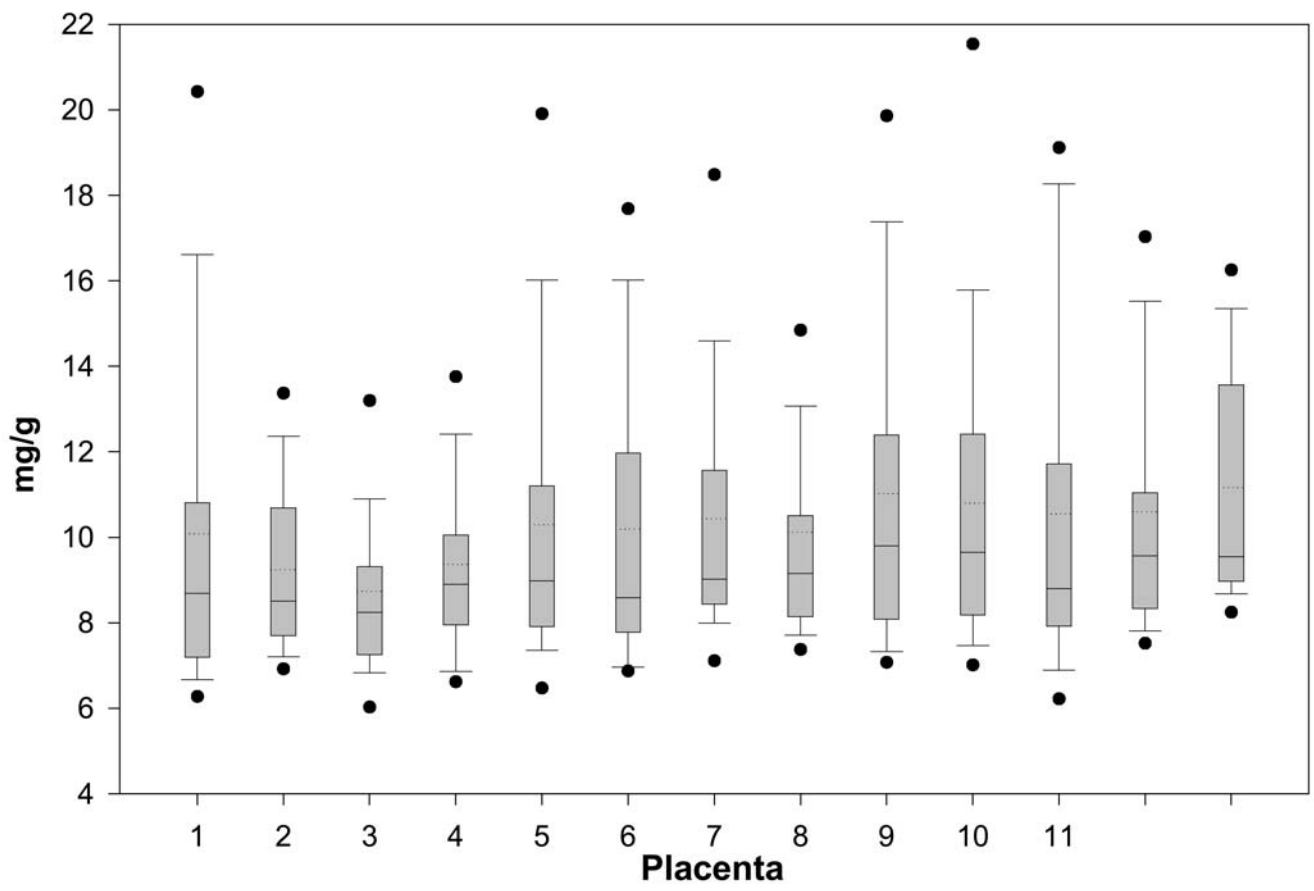

# Pb

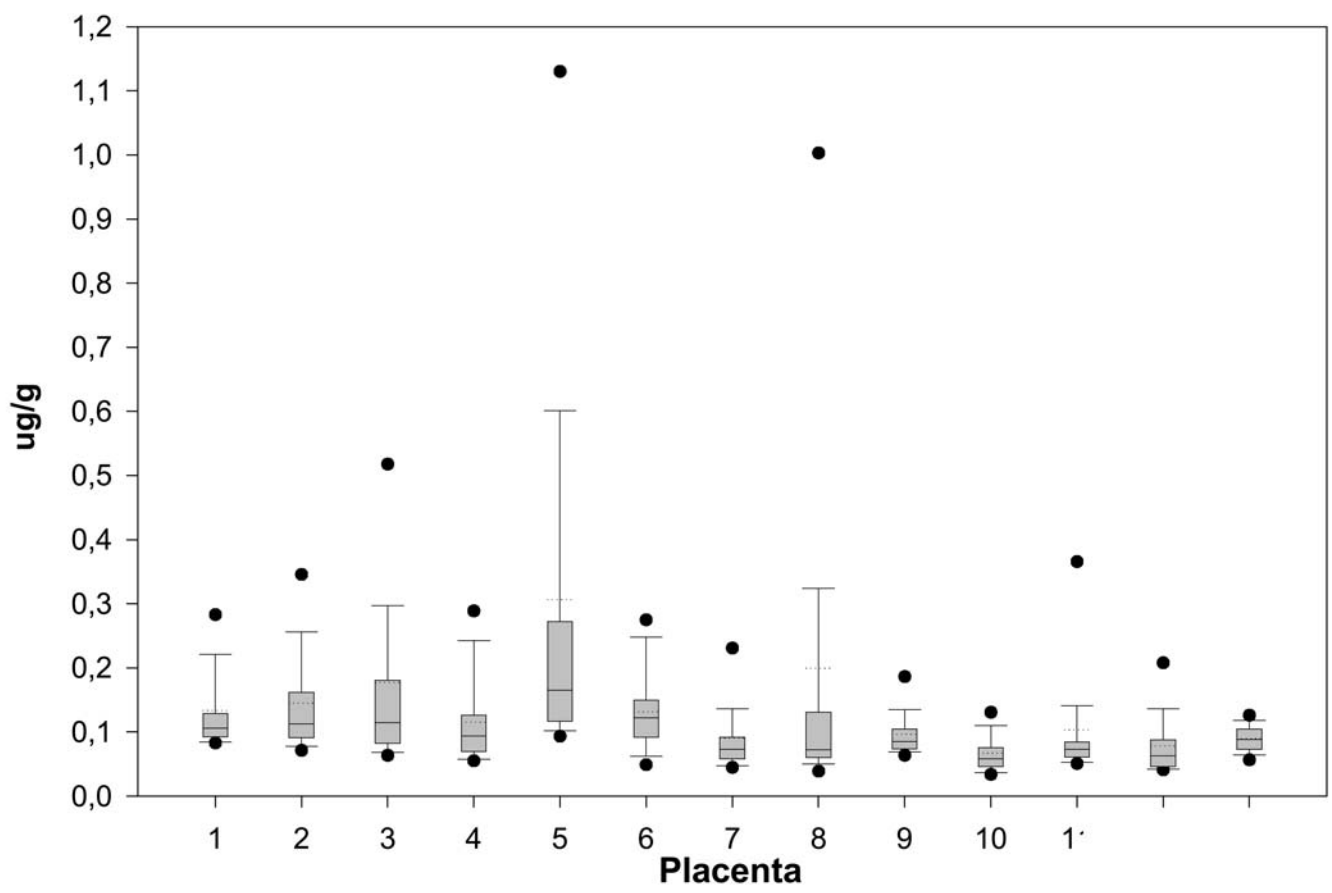

**S**

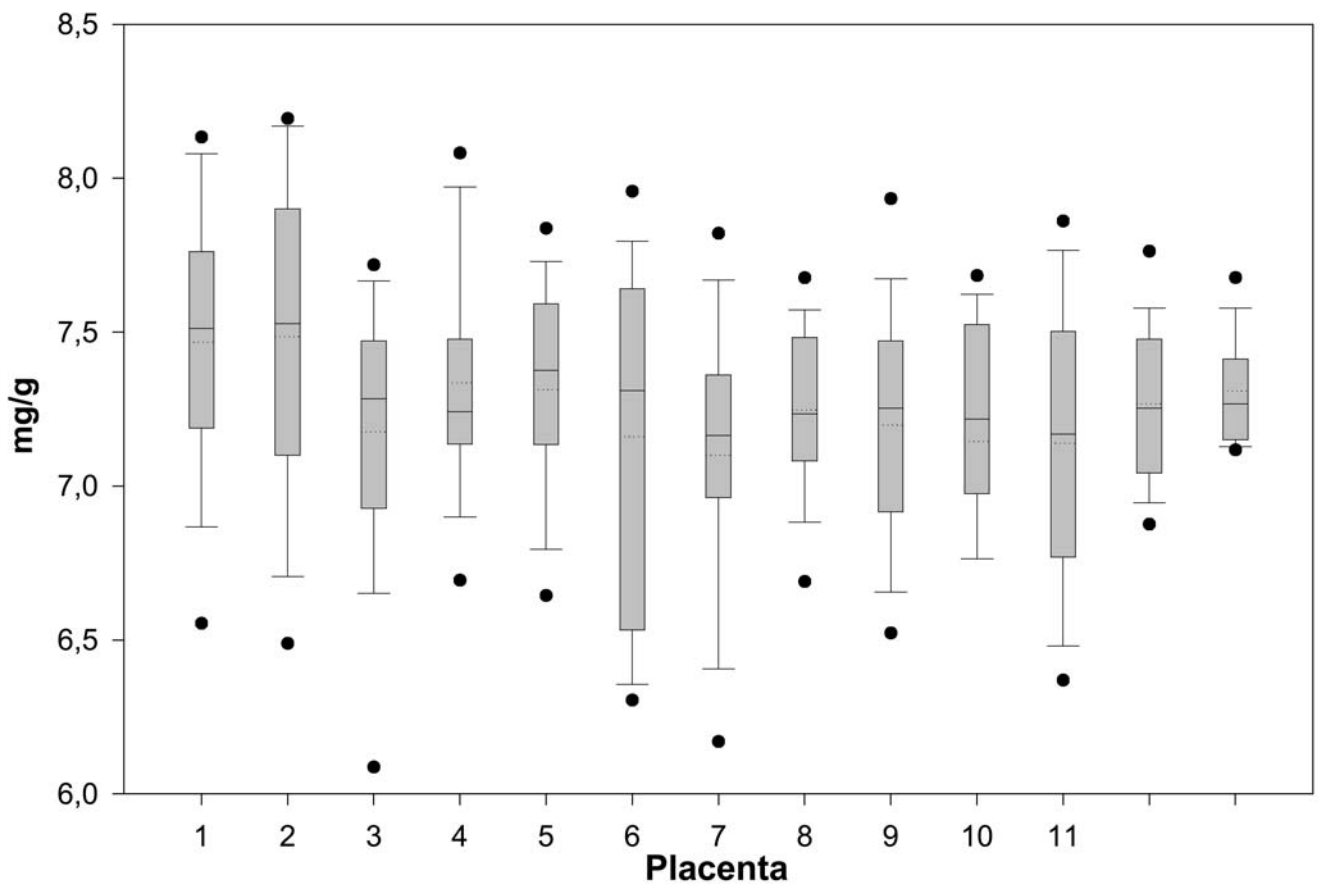

# Sr

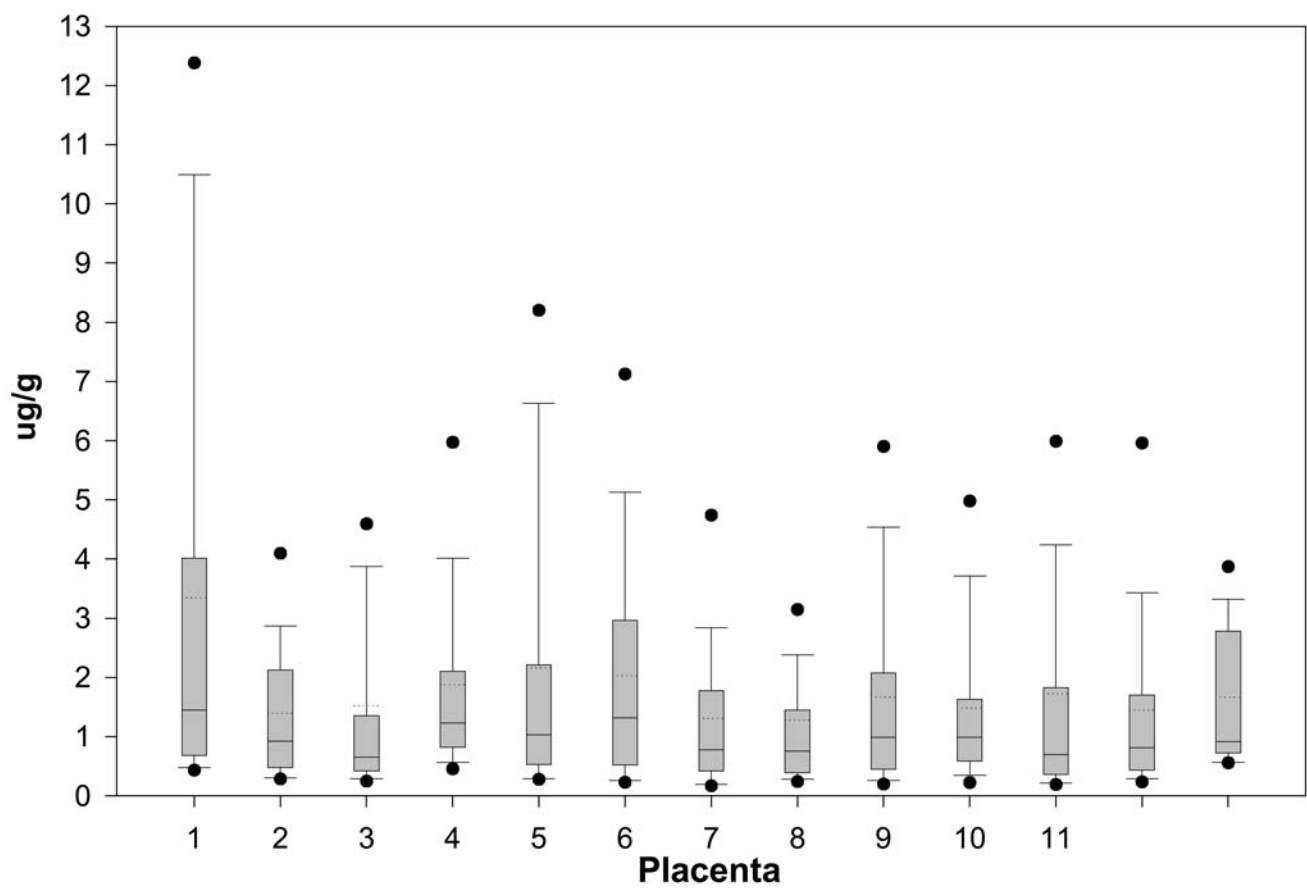

# Zn

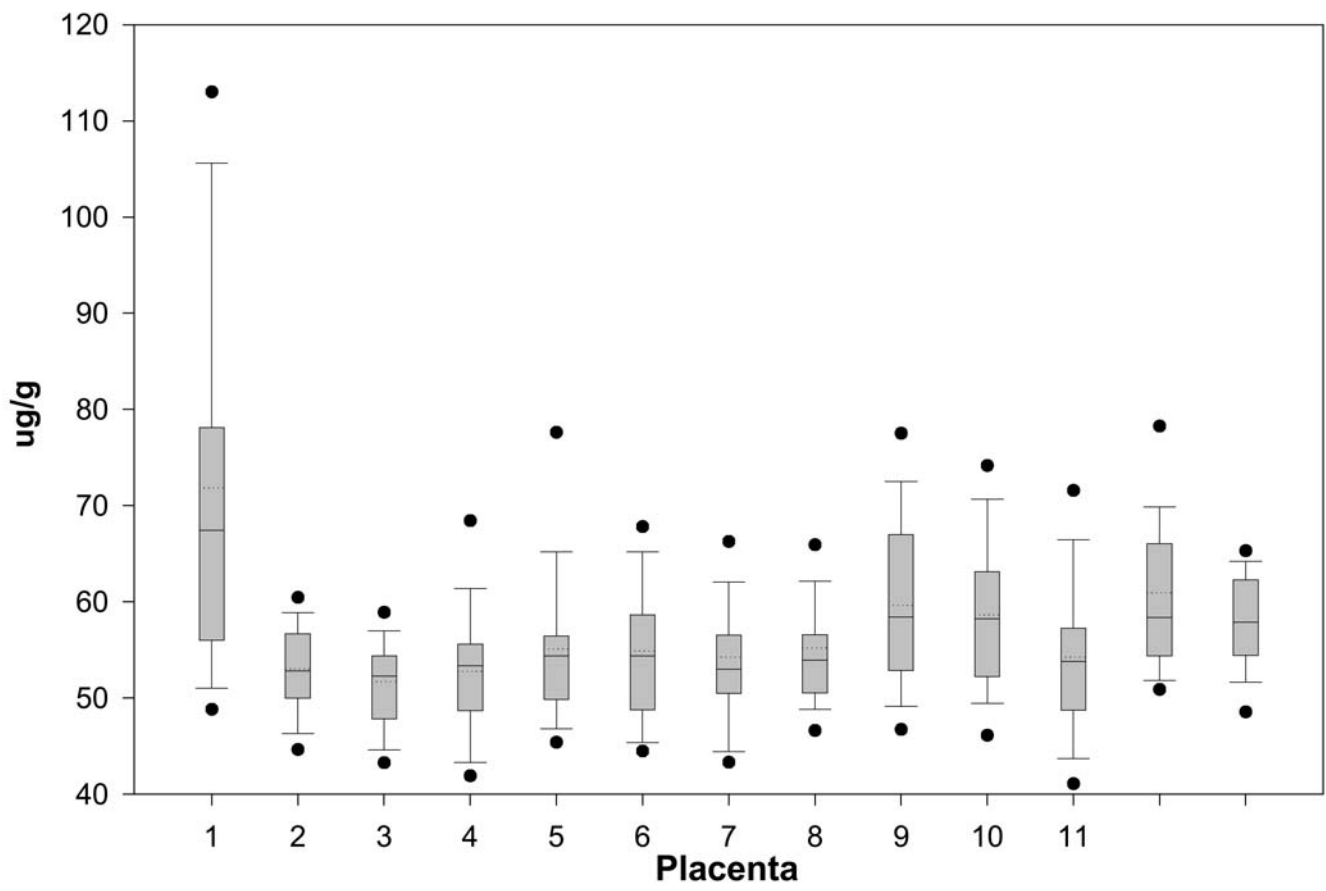

Supplement: elements.pdf [file elements.pdf]
